# Supplementary material
Source: PubMed Central journal article supplement (PMC8056313)
Supplement: jamainternmed-e211154-s001.pdf [file jamainternmed-e211154-s001.pdf]

## Supplemental Online Content

Tran PT, Antonelli PJ, Hincapie-Castillo JM, Winterstein AJ. Association of US Food and Drug Administration removal of indications for use of oral quinolones with prescribing trends. *JAMA Intern Med*. Published online April 19, 2021. doi:10.1001/jamainternmed.2021.1154

**eMethods 1.** Model specification for interrupted time series analysis

**eMethods 2.** Specifications for the sensitivity analysis testing spill-over effects on treatment of community-acquired pneumonia and examination of a negative control cohort of with skin infections.

**eMethods 3.** JoinPoint regression specifications

**eFigure 1.** Flow diagram for inclusion and exclusion of enrollees to assemble study cohorts

**eFigure 2.** Trends of disease rate for the four study conditions over time

**eFigure 3.** Time trends of oral quinolone prevalence across all treated episodes by three main medical conditions

**eFigure 4.** Trends in oral antibiotic use prevalence among adults with community-acquired pneumonia

**eFigure 5.** Breakpoints and trend lines fitted by Joinpoint regression

**eFigure 6.** Distribution of hypothetical change points surrounding the tested label change

**eTable 1.** ICD-9-CM and ICD-10-CM\* codes used to define study cohorts and excluded conditions

**eTable 2.** Infection categories based on Clinical Classification Software (CCS) for ICD-9-CM and Clinical Classification Software Refined (DXCCSR) for ICD-10-CM

**eTable 3.** ICD-9-CM and ICD-10-CM\* codes used for exclusion of patients with potentially complicated urinary tract infections

**eTable 4.** Demographic characteristics of the three study cohorts

**eTable 5.** Impact of label changes on antibiotic use by medical condition– interrupted time-series analyses

**eTable 6.** Sensitivity analyses for interrupted time series models when excluding the phase-in period surrounding the labeling change (Nov 2015 to Jul 2016), shortening the pre-period (May 2015 to April 2016) and testing for spillovers effects in quinolone use for community acquired pneumonia

**eTable 7.** Joinpoint regression results

**eTable 8.** Monthly aggregated input data for the interrupted time series analysis of the three study cohorts

This supplemental material has been provided by the authors to give readers additional information about their work.

40 **eMethod 1. Model specification for interrupted time series analysis**

41 The ITS regression was modeled as

42  $Y_t = \beta_0 + \beta_1 * T_t + \beta_2 * X_t + \beta_3 * (T_t - T_0) * X_t + \beta_m * \text{month} + \varepsilon$  where,

43  $\beta_0$  (baseline level): prevalence of oral quinolone use at the beginning of the study  
44 period;

45  $\beta_1$  (pre-label change trend): average monthly change of oral quinolone prevalence  
46 between January 2013 and April 2016;

47  $\beta_2$  (level change): Immediate change in quinolone prevalence between April to May  
48 2016;

49  $\beta_3$  (slope change): average monthly change in trend of oral quinolone use after the label  
50 change;

51  $T_t$ : time since January 2013;

52  $T_0$ : time of the label change in May 2016;

53  $X_t$ : dummy variable for pre and post label change;

54  $\beta_m$ : a series of indicators for calendar months;  $\varepsilon$ : the random error term.

55 We assumed the level and the trend of oral quinolones after May 2016 would have  
56 remained the same as before if no label changes of quinolones were introduced (i.e.,  
57 counterfactual).

58 We provided monthly aggregated data of our main analyses for replication in **eTable 8**.

59 For falsification analysis we applied the same model to a series of hypothetical change  
60 points surrounding the tested FDA label change. We fit models using the same 24  
61 months period before and after each hypothesized change point and, to improve model  
62 fit across data points with actual interruptions, an alternative set of models that used  
63 only 12 months before and after. All other model specifications were identical.

64

65

66 **eMethod 2: Specifications for the sensitivity analysis testing spill-over effects on**  
67 **treatment of community-acquired pneumonia and examination of a negative**  
68 **control cohort of with skin infections.**

69 For community-acquired pneumonia, similar to the other cohorts, patients  $\geq 19$   
70 years of age entered the cohort at a new outpatient encounter with principal diagnosis  
71 for pneumonia (**eTable 1**) (index day). We required patients to have continuous health  
72 plan enrollment and prescription coverage 90 days before and 5 days after the index  
73 day. This time window was used to exclude patients with other infections except upper  
74 respiratory tract infections (**eTable 2**) and hospitalizations (to focus on community-  
75 acquired pneumonia). We applied the same algorithm to measure antibiotics use as for  
76 the three main study cohorts.

77 For examination of skin and soft tissue infections, adult patients ( $\geq 19$  years of  
78 age) entered for evaluation when they had a primary or secondary diagnosis for skin or  
79 subcutaneous tissue infections in the outpatient setting (**eTable 1**). We required patients  
80 to have continuous health plan enrollment and prescription coverage 365 days before  
81 and 5 days after the index day to exclude history of diabetes and external injury which  
82 may require quinolone use (**eTable 3**). We also excluded patients with previous  
83 infections within 90 days and captured all dispensed non-quinolone antibiotics within  $\pm 5$   
84 days of the index day similar to our main study cohorts. While quinolones are typically  
85 not recommended for treatment of soft tissue infections, delafloxacin (a quinolone) was  
86 approved specifically for skin infection in June 2017. Thus, we shortened the post label  
87 change period (May 2016 to April 2017) to avoid any impact of this approval decision on  
88 the interrupted time-series analysis. Of note, while the denominators of other analyses  
89 were antibiotic-treated episodes, the denominator of this cohort included both episodes  
90 of skin and soft tissue infections treated and non-treated with antibiotics.

91

### 92 **eMethod 3: Joinpoint regression specifications**

93 Joinpoint regression has been developed by the National Cancer Institute  
94 (<https://surveillance.cancer.gov/joinpoint/> accessed Dec 19, 2020). In brief, the software  
95 detects natural breakpoints without any pre-specification using a Monte Carlo  
96 permutation method. We specified a maximum of 3 break points, 10,000 permutations  
97 and calculated 95% CI by empirical quantile (method 1) with 15,000 resamples. We  
98 chose the option to fit autocorrelated errors model based on the data.

99 Joinpoint regression (i.e., change point or break point regression) assumes that data  
100 can be divided into linear segments. In our case, we chose maximum of 3 break points  
101 (i.e., 4 segments). The model will first fit with one point and identify the most significant  
102 point in the time trend. The process is repeated with 2 break points, and 3 break points.  
103 Finally, it will compare the fitted models and choose the best model. Joinpoint provides  
104 significant break points with confidence intervals and an intercept and slope for each  
105 segment. Our falsification test aimed to check whether our chosen point of the label  
106 change is valid and thus, we reported only the significant break points, but the  
107 intercepts and slopes can be found in the figure legends. **eFigure 1. Flow diagram for  
108 inclusion and exclusion of enrollees to assemble study cohorts**

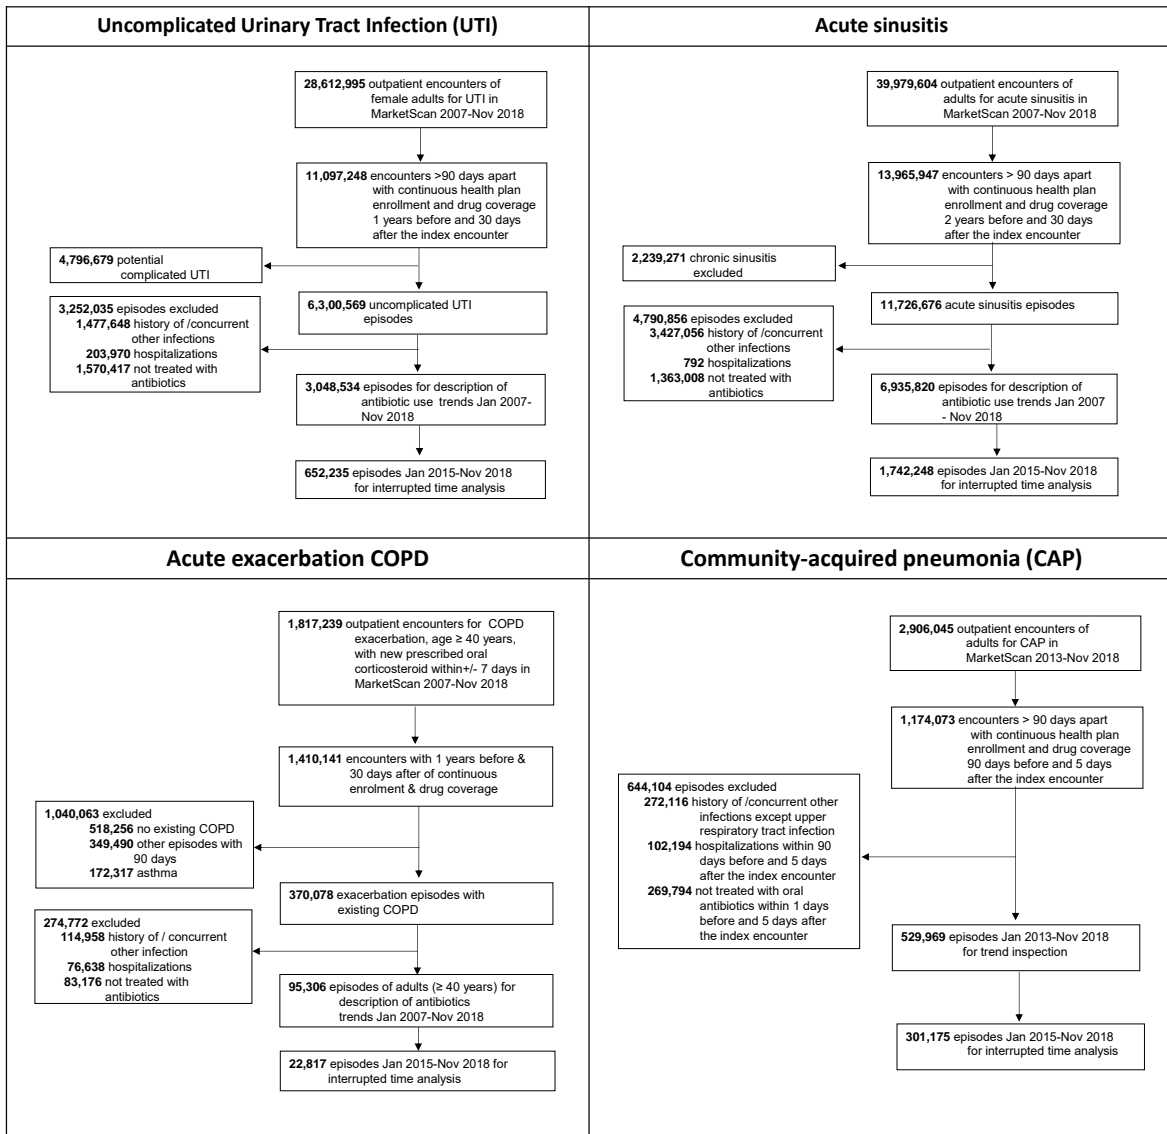

110 **eFigure 2. Trends of disease and antibiotic utilization rates for the four study conditions**

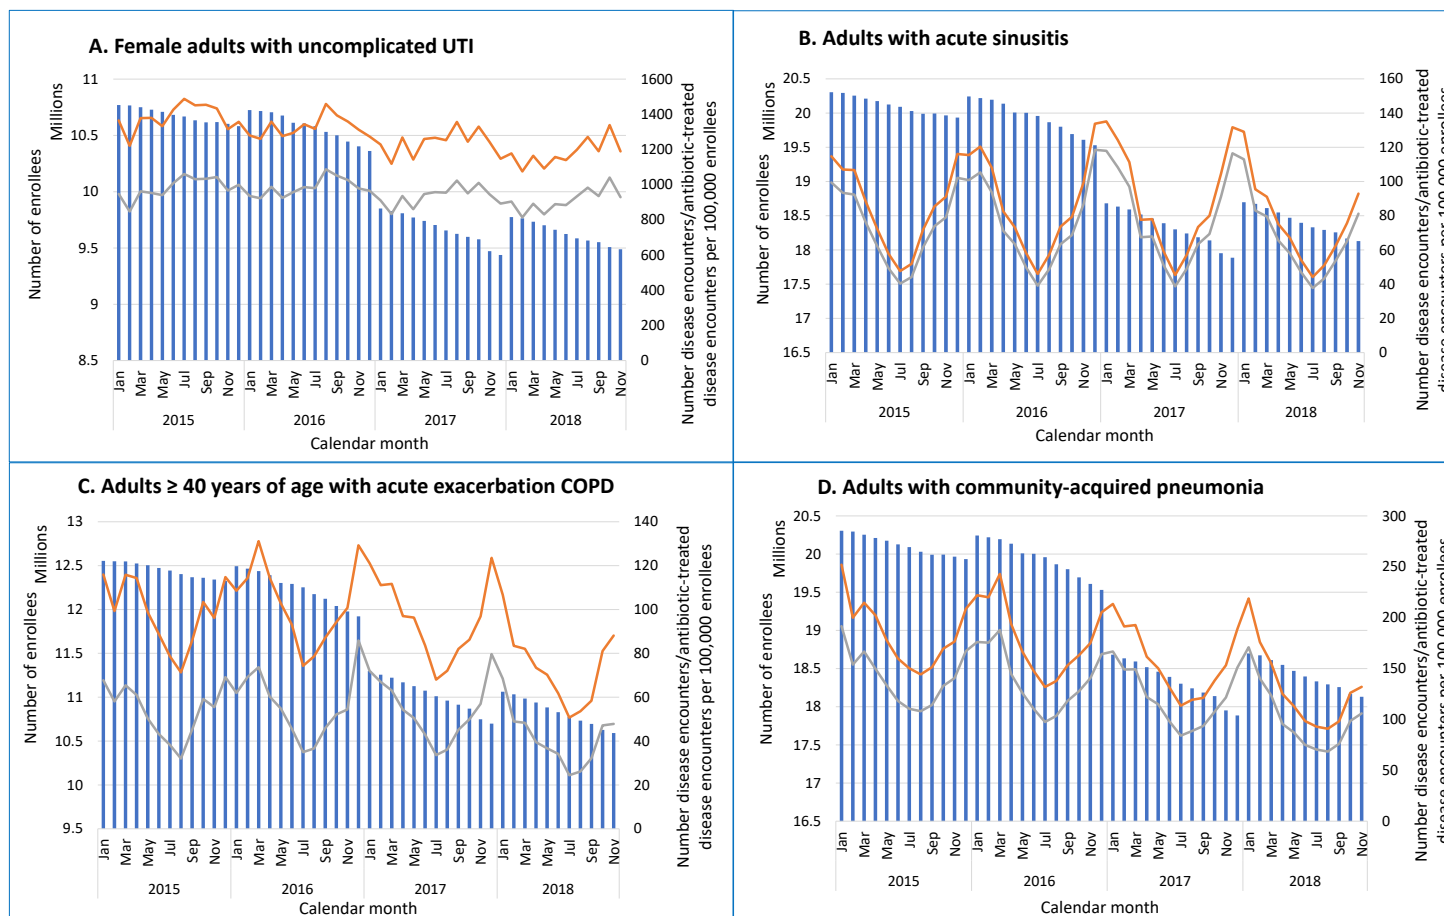

111 ■ Enrollee — Disease rate — Antibiotic-treated rate

112 Disease rates were calculated as the proportion of medical encounters with index diagnosis per 100,000 enrollee-months (denominator). Populations of the denominators were female  
 113 adults for uncomplicated UTI, adults for acute sinusitis and community-acquired pneumonia, and adults ≥ 40 years of age for acute exacerbation COPD. These analyses were  
 114 conducted before applying any exclusion criteria.

115

116 **eFigure 3. Time trends of Oral Quinolone prevalence across all treated episodes by medical condition**

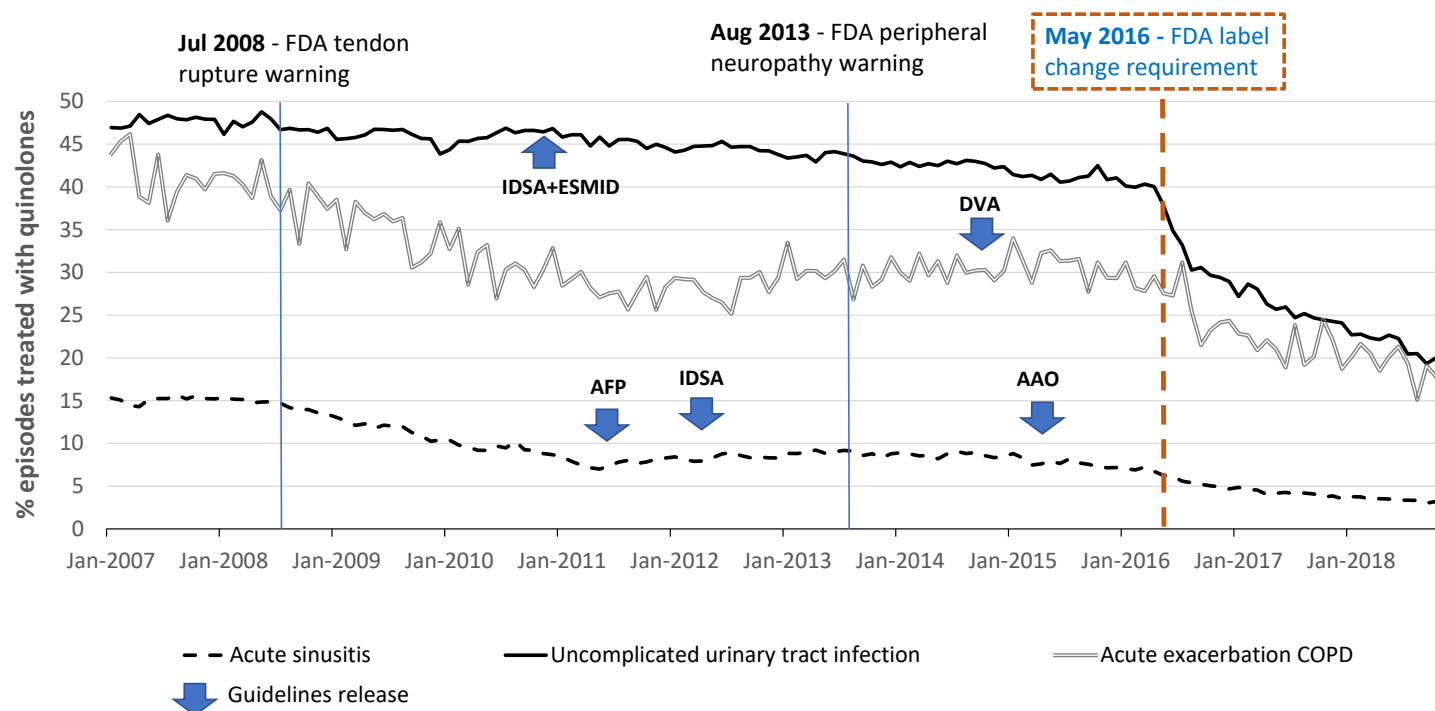

117

118 **IDSA + ESMID** – A 2010 update guideline for the treatment of acute uncomplicated cystitis and pyelonephritis in women by the Infectious Diseases Society of America and the  
 119 European Society for Microbiology and Infectious Diseases. A summary was published in March 2011.

120 **IDSA** – A clinical practice guideline for acute bacterial rhinosinusitis in children and adults published in April 2012.

121 **AFP** – A clinical practice guideline for acute rhinosinusitis in adults published by American Family Physician in May 2011

122 **AAO** – An update of a clinical practice guideline for adult sinusitis by American Academy of Otolaryngology-Head and Neck Surgery Foundation in April 2015

123 **DVA** – A clinical practice guideline for the management of chronic obstructive pulmonary disease published by US Department of Veterans Affairs in December 2014.

124

125 **eFigure 4. Trends in oral antibiotic use prevalence among adults with community-**  
126 **acquired pneumonia.**

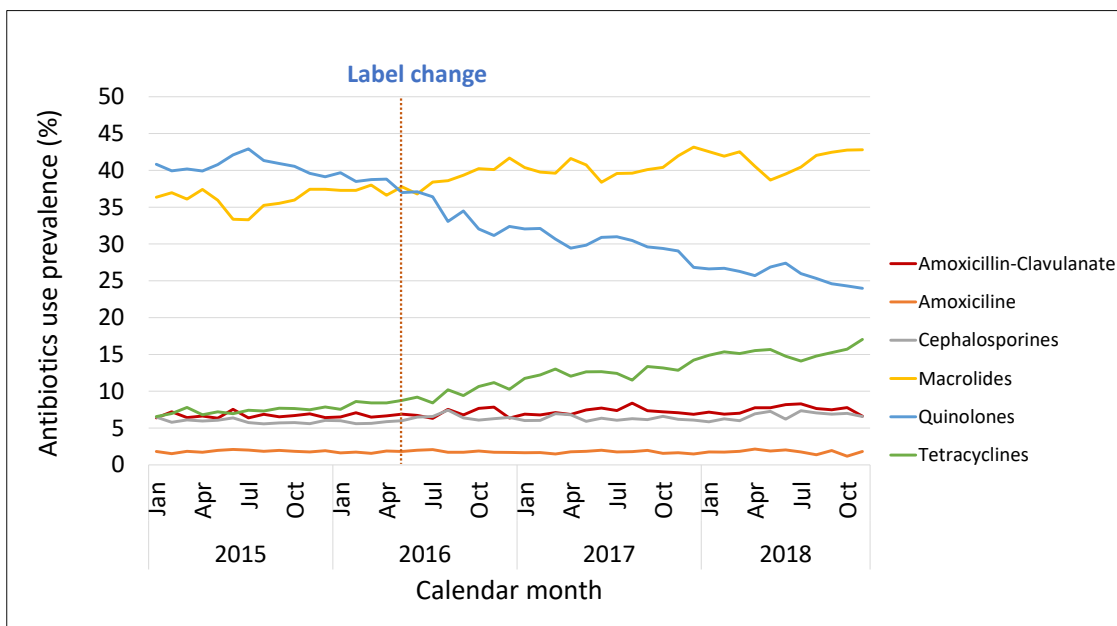

127  
128  
129



130 eFigure 5. Breakpoints and trend lines fitted by Joinpoint regression

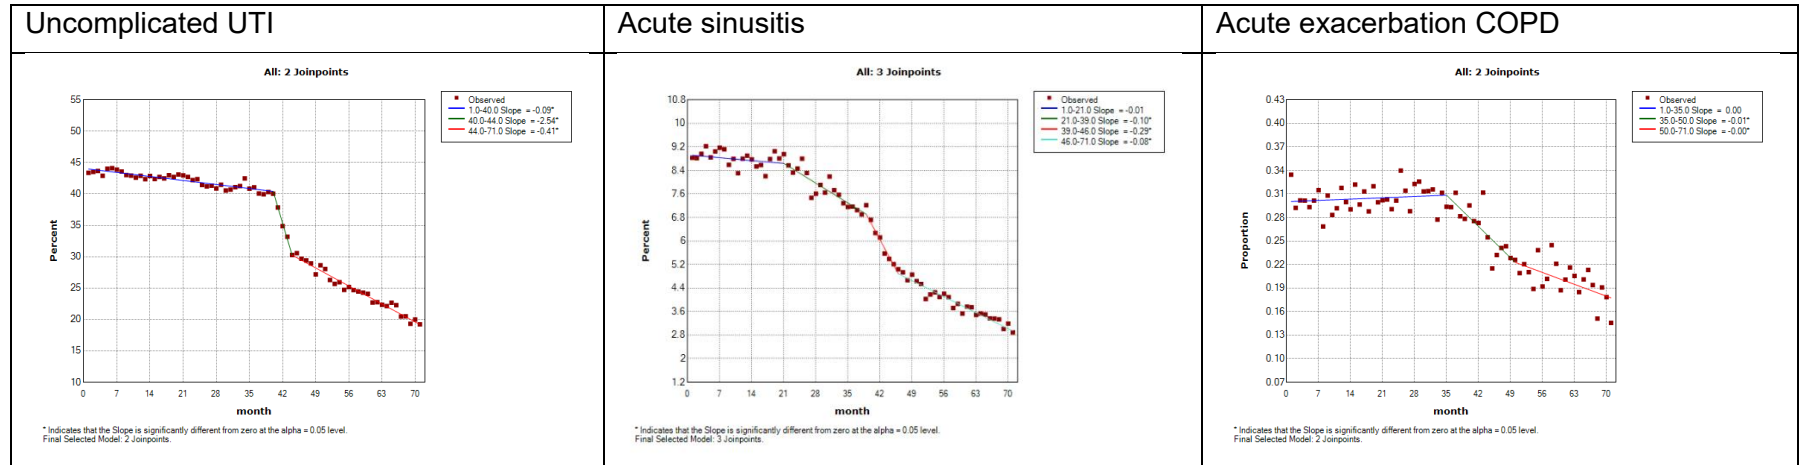

131

132

133

134 **eFigure 6. Distribution of hypothetical change points surrounding the tested label**  
 135 **change**

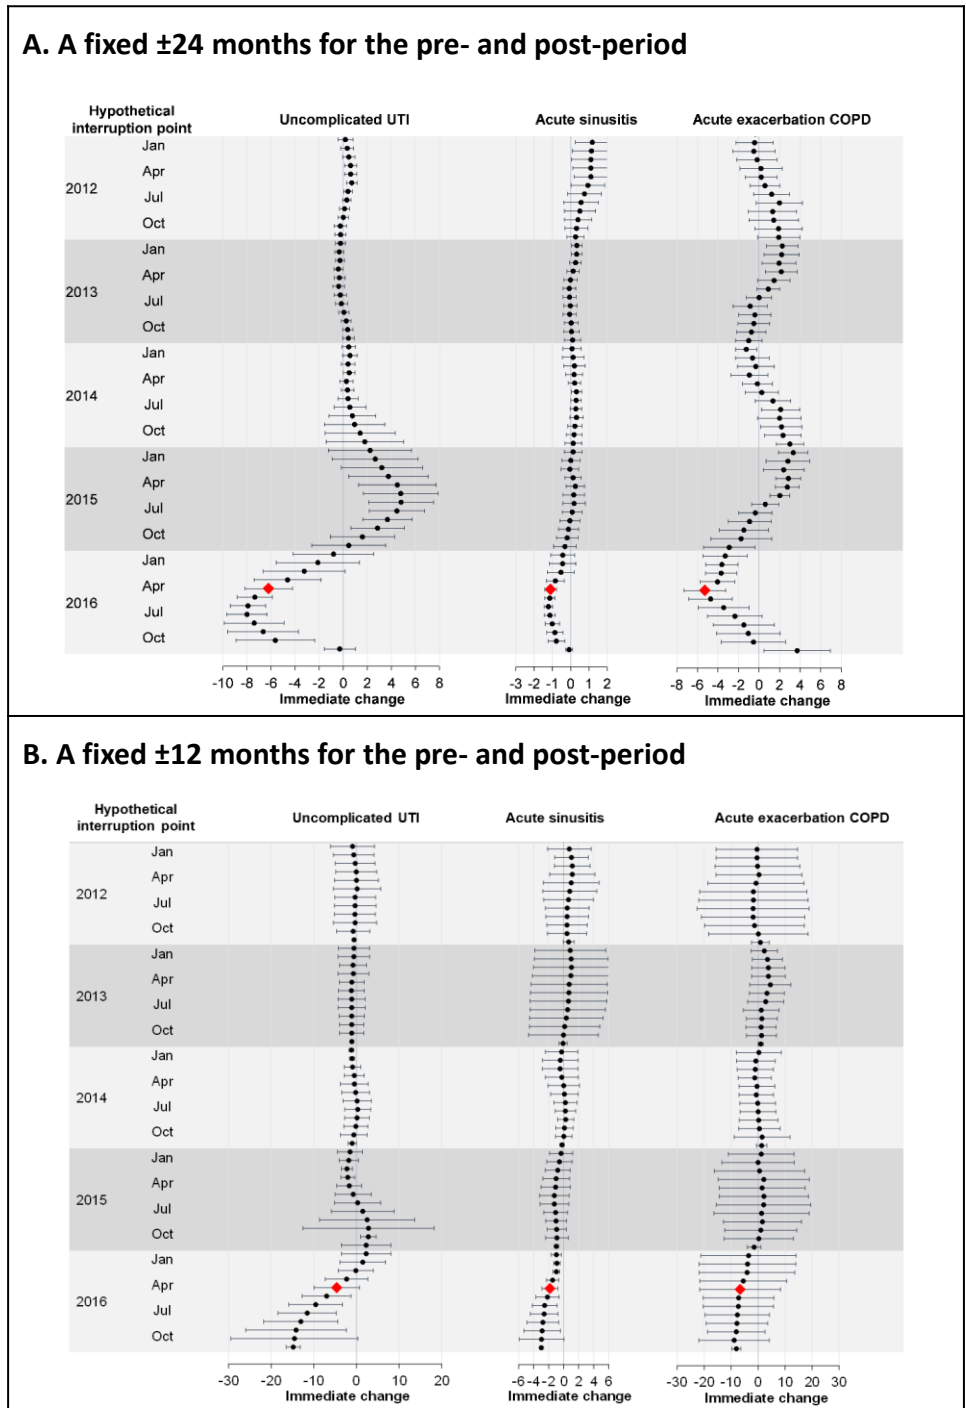

136

137 The red diamond indicates our tested change point (May 2016).

138 These falsification tests include a consecutive series of hypothetical change points from Jan 2012 to Dec 2016. We used a fixed  $\pm 24$   
 139 months (figure A) or  $\pm 12$  months (figure B) for the pre- and post-period for each hypothetical interruption point. Model specifications  
 140 were similar to our main analyses.

141 **eTable 1. ICD-9-CM and ICD-10-CM\* codes used to define study cohorts and**  
 142 **excluded conditions**

| Studied population/<br>excluded conditions | ICD-9-CM diagnosis codes<br>(any position, unless<br>specified)                                                                                                                                                                                                                                                                              | ICD-10-CM diagnosis codes (any<br>position, unless specified)                                                                                                                                                                                                                                                                                                                                                                                                                                                                                                                                                                                                                                                                                                                                                                                                                                                                                                                                                                |
|--------------------------------------------|----------------------------------------------------------------------------------------------------------------------------------------------------------------------------------------------------------------------------------------------------------------------------------------------------------------------------------------------|------------------------------------------------------------------------------------------------------------------------------------------------------------------------------------------------------------------------------------------------------------------------------------------------------------------------------------------------------------------------------------------------------------------------------------------------------------------------------------------------------------------------------------------------------------------------------------------------------------------------------------------------------------------------------------------------------------------------------------------------------------------------------------------------------------------------------------------------------------------------------------------------------------------------------------------------------------------------------------------------------------------------------|
| Uncomplicated urinary tract<br>infection   | 595.0*, 595.9*, 599.0*                                                                                                                                                                                                                                                                                                                       | N30.0*, N30.9*, N39.0*                                                                                                                                                                                                                                                                                                                                                                                                                                                                                                                                                                                                                                                                                                                                                                                                                                                                                                                                                                                                       |
| Acute sinusitis                            | 461.**                                                                                                                                                                                                                                                                                                                                       | J01.**                                                                                                                                                                                                                                                                                                                                                                                                                                                                                                                                                                                                                                                                                                                                                                                                                                                                                                                                                                                                                       |
| Acute exacerbation COPD                    | 491.** -except 491.20 coded for<br>obstructive chronic bronchitis<br>without exacerbation, 492.**, or<br>496.** as primary diagnosis<br>code or presence of a<br>secondary diagnosis with a<br>primary diagnosis of respiratory<br>failure 518.81, 518.82, or<br>518.84                                                                      | J41.**, J42.**, J43.**, or J44.** -except<br>J44.9 coded for COPD, unspecified as<br>primary diagnosis code or presence of a<br>secondary diagnosis with a primary<br>diagnosis of respiratory failure J96.00,<br>J96.01, J96.02, J96.90, J96.91, J96.92,<br>J80.**, R06.03, J96.20, J96.21, J96.22                                                                                                                                                                                                                                                                                                                                                                                                                                                                                                                                                                                                                                                                                                                          |
| Chronic sinusitis                          | 471.*, 473.*                                                                                                                                                                                                                                                                                                                                 | J32.*, J33.*                                                                                                                                                                                                                                                                                                                                                                                                                                                                                                                                                                                                                                                                                                                                                                                                                                                                                                                                                                                                                 |
| Asthma                                     | 493.*                                                                                                                                                                                                                                                                                                                                        | J45.*                                                                                                                                                                                                                                                                                                                                                                                                                                                                                                                                                                                                                                                                                                                                                                                                                                                                                                                                                                                                                        |
| Pneumonia                                  | 480.0-487.0                                                                                                                                                                                                                                                                                                                                  | J12.0, J12.1, J12.2, J12.81, J12.3,<br>J12.89, J12.9, J13, J181, J150, J151,<br>J14, J15.4, J15.3, J15.20, J15.211,<br>J15.212, J15.29, J15.8, J15.5, J15.6,<br>A48.1, J15.9, J15.7, J16.0, J16.8, B25.0,<br>A37.01, A37.11, A37.81, A37.91, A22.1,<br>B440, J17, B77.81, J18.0, J18.8, J18.9,<br>J10.00, J1001, J10.08, J11.00, J11.08,<br>J12.9                                                                                                                                                                                                                                                                                                                                                                                                                                                                                                                                                                                                                                                                            |
| Skin and subcutaneous<br>infections        | 020.1, 021.0, 022.0, 031.1,<br>032.85, 035, 039.0, 680.0,<br>680.1, 680.2, 680.3, 680.4,<br>680.5, 680.6, 680.7, 680.8,<br>680.9, 681.00, 681.01, 681.02,<br>681.10, 681.11, 681.9, 682.0,<br>682.1, 682.2, 682.3, 682.4,<br>682.5, 682.6, 682.7, 682.8, 689,<br>684, 685.0, 685.1, 686.0,<br>686.00, 686.01, 686.09, 686.1,<br>686.8, 686.9 | A20.1, A21.0, A22.0, A31.1, A36.3,<br>A43.1, A46, B78.1, E83.2, K12.2,<br>L01.00, L01.01, L01.02, L01.03, L01.09,<br>L01.1, L02.01, L02.02, L02.03, L02.11,<br>L02.12, L02.13, L02.211, L02.212,<br>L02.213, L02.216, L02.219, L02.221,<br>L02.222, L02.223, L02.224, L02.225,<br>L02.226, L02.229, L02.231, L02.232,<br>L02.233, L02.234, L02.235, L02.236,<br>L02.239, L02.31, L0232, L02.33,<br>L02.411, L02.412, L02.413, L02.414,<br>L02.415, L02.416, L02.419, L02.421,<br>L02.422, L02.423, L02.424, L02.425,<br>L02.426, L02.429, L02.431, L02.432,<br>L02433, L02.434, L02.435, L02.436,<br>L02439, L02.511, L02.512, L02.519,<br>L02521, L02.522, L02.529, L02.531,<br>L02532, L02.539, L02.611, L02.612,<br>L02619, L02.621, L02.622, L02.629,<br>L02631, L02.632, L02.639, L02811,<br>L02.818, L02.821, L02.828,<br>L02.831, L02.838, L02.91, L02.92,<br>L02.93, L03.011, L03.012, L03.019,<br>L03.021, L03.022, L03.029, L03.031,<br>L03.032, L03.039, L03.041, L03.042,<br>L03.049, L03.111, L03.112, L03.113, |

|  |  |                                                                                                                                                                                                                                                                                                                                                                                                                                                                                            |
|--|--|--------------------------------------------------------------------------------------------------------------------------------------------------------------------------------------------------------------------------------------------------------------------------------------------------------------------------------------------------------------------------------------------------------------------------------------------------------------------------------------------|
|  |  | L03.114, L03.115, L03.116, L03.119,<br>L03.121, L03.122, L03.123, L03.124,<br>L03.125, L03.126, L03.129, L03.211,<br>L03.212, L03.213, L03.221, L03.222,<br>L03.311, L03.312, L03.313, L03.314,<br>L03.315, L03.316, L03.317, L03.319,<br>L03.321, L03.322, L03.323, L03.324,<br>L03.325, L03.326, L03.327, L03.329,<br>L03.811, L03.818, L03.891, L03.898,<br>L03.90, L03.91, L05.01, L05.02, L05.91,<br>L05.92, L08.0, L08.1, L08.81, L08.82,<br>L08.89, L08.9, L88, L92.8, L98.0, L98.3 |
|--|--|--------------------------------------------------------------------------------------------------------------------------------------------------------------------------------------------------------------------------------------------------------------------------------------------------------------------------------------------------------------------------------------------------------------------------------------------------------------------------------------------|

143

144

145

146

147

(\*) We cross-walked the original ICD-9-CM-based definitions of the target indications to the ICD-10-CM coding system using SuperCoder (TCI Supercoder, Durham, NC), which uses Medicare's General Equivalency Mapping (GEM) plus approximation codes and clinical judgment. We then inspected plots of the monthly prevalence of each indication grouping to ensure consistent study populations throughout the ICD transition period.

148

149 **eTable 2. Infection categories based on Clinical Classification Software (CCS) for**  
 150 **ICD-9-CM and Clinical Classification Software Refined (DXCCSR) for ICD-10-CM**

| CCS for ICD-9-CM                                                                                                                                                                                                                                                                                                                                                                         | DXCCSR for ICD-10-CM                                                                                                                                                                                                                                                                                                                                                                                                                                                                                                                                                    |
|------------------------------------------------------------------------------------------------------------------------------------------------------------------------------------------------------------------------------------------------------------------------------------------------------------------------------------------------------------------------------------------|-------------------------------------------------------------------------------------------------------------------------------------------------------------------------------------------------------------------------------------------------------------------------------------------------------------------------------------------------------------------------------------------------------------------------------------------------------------------------------------------------------------------------------------------------------------------------|
| Intestinal infection; Urinary tract infections;<br>Skin and subcutaneous tissue infections;<br>Infective arthritis and osteomyelitis; Bacterial<br>infection (unspecified site)<br><br>HIV infection; Viral infection; Other<br>infections; including parasitic<br><br>Sexually transmitted; Other CNS infection<br>and poliomyelitis; Other upper respiratory<br>infections; Septicemia | Intestinal infection; Urinary tract infections; Skin and<br>subcutaneous tissue infection; Infective arthritis,<br>Spondylopathies/ spondyloarthropathy (including<br>infection); Bacterial infections; Maternal intrauterine<br>infection; Perinatal infections; Sequela of specified<br>infectious diseases condition<br><br>HIV infection; Viral infection; Fungal infections, Parasitic,<br>other infection<br><br>Sexually transmitted infections; Other specified CNS<br>infection and poliomyelitis; Other specified upper<br>respiratory infections; Septicemia |

151

152

153  
154

**eTable 3. ICD-9-CM and ICD-10-CM\* codes used for exclusion of patients with potentially complicated urinary tract infections**

| Conditions                                                                    | ICD-9-CM diagnosis codes                                                                                                                                                                                                   | ICD-10-CM diagnosis codes                                                                                                                                                                      |
|-------------------------------------------------------------------------------|----------------------------------------------------------------------------------------------------------------------------------------------------------------------------------------------------------------------------|------------------------------------------------------------------------------------------------------------------------------------------------------------------------------------------------|
| Urologic abnormalities (not include malignancy)                               | 594.*, 599.6, 599.9, 592.*, 619.0, 753.5, 753.9, V13.0, V44.6, V45.74                                                                                                                                                      | N21.*, N13.9, N36.9, N39.9, N20.*, N22, N82.0, N82.1, Q64.1, Q64.8, Q64.9, Z87.448, Z93.6, Z90.6                                                                                               |
| Spinal injury                                                                 | 344.*, 805.*, 806.*, 952.*                                                                                                                                                                                                 | G82.20, G83, S32, S37                                                                                                                                                                          |
| Malignancy                                                                    | 140.*-209.*, 230.*-239.*, 258.*, V10.*                                                                                                                                                                                     | C**, D0*, D1*, D2*, D4*, D37, D38, D39, E31, Z85                                                                                                                                               |
| Chronic ulcer of skin                                                         | 707.*                                                                                                                                                                                                                      | L97.*, L98.*                                                                                                                                                                                   |
| Multiple sclerosis                                                            | 340                                                                                                                                                                                                                        | G35                                                                                                                                                                                            |
| Regional enteritis, ulcerative enterocolitis                                  | 555.*, 556.*                                                                                                                                                                                                               | K50.*, K51                                                                                                                                                                                     |
| Organ transplant                                                              | 996.8, V42.*                                                                                                                                                                                                               | T86.*, Z94.*                                                                                                                                                                                   |
| HIV/AIDS                                                                      | 042.*                                                                                                                                                                                                                      | B20.*                                                                                                                                                                                          |
| Stroke                                                                        | 434.*, 435.*                                                                                                                                                                                                               | I66.*, G45.*, I67.848                                                                                                                                                                          |
| Chemotherapy or radiation                                                     | V58.0, V58.1, V66.1, V66.2, V67.1, V67.2, V15.3                                                                                                                                                                            | Z51.0, Z51.1, Z51.89, Z08.*, Z09.*, Z92.3                                                                                                                                                      |
| Interstitial cystitis, other urologic problems, and other urologic infections | 595.1, 595.2, 595.3, 595.4, 595.81, 595.82, 595.89, 596.0, 596.1, 596.2, 596.3, 596.4, 596.5, 596.51, 596.52, 596.53, 596.54, 596.55, 596.59, 596.6, 596.7596.8, 596.9, 788.31, 016.30, 098.0, 112.2, 131.00, 136.9, 760.1 | N30.10, N30.11, N30.20, N30.21, N30.30, N30.31, N30.40, N30.41, N30.80, N30.81, N31, N32, N36.44, N39.41, A18.13, A54.0, A54.1, A56.01, A59.00, B37.41, B37.42, B37.49, B89, B64, B99.9, P00.1 |
| Pyelonephritis                                                                | 590.0, 590.1, 590.8                                                                                                                                                                                                        | N11.0, N11.1, N11.8, N10.*, N12.*, N11.9, N13.6, N16.*                                                                                                                                         |
| Renal failure                                                                 | 403.*, 404.*, 585.*, 586.*, V45.1, V56.*                                                                                                                                                                                   | I12.*, I13.*, N18.*, N19.*, Z91.15, Z99.2                                                                                                                                                      |
| Rheumatologic conditions                                                      | 710.*, 714.*, 720.0,                                                                                                                                                                                                       | M05.*, M06.*, M45, M08.1, M48.8X                                                                                                                                                               |
| Sarcoidosis                                                                   | 135.*                                                                                                                                                                                                                      | D86.*                                                                                                                                                                                          |
| Cystic fibrosis                                                               | 277.0                                                                                                                                                                                                                      | E84.*                                                                                                                                                                                          |
| Parkinson's                                                                   | 332.*                                                                                                                                                                                                                      | G20.*, G21.*                                                                                                                                                                                   |
| Diabetes                                                                      | 249.*, 250.*                                                                                                                                                                                                               | E891, O24, O998, E10, E11, E13                                                                                                                                                                 |
| External injuries                                                             | E000-E999                                                                                                                                                                                                                  | S00-T88                                                                                                                                                                                        |

155  
156  
157  
158  
159

(\* We cross-walked the original ICD-9-CM-based definitions of the target indications to the ICD-10-CM coding system using SuperCoder (TCI Supercoder, Durham, NC), which uses Medicare's General Equivalency Mapping (GEM) plus approximation codes and clinical judgment. We then inspected plots of the monthly prevalence of each indication grouping to ensure consistent study populations throughout the ICD transition period.

160  
  
161  
  
162  
  
163  
  
164  
  
165

**eTable 4. Demographic characteristics of the three study cohorts**

| <b>Uncomplicate UTI (female only)*</b> |                            |                            |                            |                            |
|----------------------------------------|----------------------------|----------------------------|----------------------------|----------------------------|
| <b>Year</b>                            | <b>2015<br/>(N=235777)</b> | <b>2016<br/>(N=161474)</b> | <b>2017<br/>(N=135729)</b> | <b>2018<br/>(N=119250)</b> |
| <b>Age</b>                             | 43.0                       | 42.0                       | 42.0                       | 41.0                       |
| Median (IQR)                           | (29.0–55.0)                | (29.0–55.0)                | (28.0–54.0)                | (28.0–53.0)                |
| <b>Region N (%)</b>                    |                            |                            |                            |                            |
| Northeast                              | 37653 (16.0)               | 22571 (14.0)               | 19851 (14.6)               | 18100 (15.2)               |
| North Central                          | 46891 (19.9)               | 32422 (20.1)               | 25289 (18.6)               | 24559 (20.6)               |
| South                                  | 111625 (47.3)              | 80141 (49.6)               | 70378 (51.9)               | 58042 (48.7)               |
| West                                   | 39186 (16.6)               | 26210 (16.2)               | 20018 (14.7)               | 18382 (15.4)               |
| Unknown                                | 422 (0.2)                  | 128 (0.1)                  | 193 (0.1)                  | 167 (0.1)                  |
| <b>Acute sinusitis</b>                 |                            |                            |                            |                            |
| <b>Year</b>                            | <b>2015<br/>(N=544186)</b> | <b>2016<br/>(N=463401)</b> | <b>2017<br/>(N=425974)</b> | <b>2018<br/>(N=308631)</b> |
| <b>Age</b>                             | 48.0                       | 48.0                       | 48.0                       | 48.0                       |
| Median (IQR)                           | (37.0–57.0)                | (37.0–57.0)                | (37.0–57.0)                | (37.0–57.0)                |
| <b>Sex (Female) N (%)</b>              | 338474 (62.2)              | 283784 (61.2)              | 259968 (61.0)              | 189203 (61.3)              |
| <b>Region N (%)</b>                    |                            |                            |                            |                            |
| Northeast                              | 88423 (16.2)               | 66121 (14.3)               | 62236 (14.6)               | 50158 (16.3)               |
| North Central                          | 117616 (21.6)              | 97930 (21.1)               | 86424 (20.3)               | 60069 (19.5)               |
| South                                  | 279585 (51.4)              | 252709 (54.5)              | 237460 (55.7)              | 167096 (54.1)              |
| West                                   | 57778 (10.6)               | 46455 (10.0)               | 39547 (9.3)                | 30989 (10.0)               |
| Unknown                                | 784 (0.1)                  | 186 (0.0)                  | 307 (0.1)                  | 319 (0.1)                  |
| <b>Acute exacerbation COPD</b>         |                            |                            |                            |                            |
| <b>Year</b>                            | <b>2015<br/>(N=8039)</b>   | <b>2016<br/>(N=6087)</b>   | <b>2017<br/>(N=5134)</b>   | <b>2018<br/>(N=3557)</b>   |
| <b>Age</b>                             | 65.0                       | 65.0                       | 64.0                       | 62.0                       |
| Median (IQR)                           | (60.0–75.0)                | (60.0–75.0)                | (60.0–74.0)                | (58.0–70.0)                |
| <b>Sex (Female) N (%)</b>              | 4169 (51.9)                | 3149 (51.7)                | 2687 (52.3)                | 1919 (53.9)                |
| <b>Region N (%)</b>                    |                            |                            |                            |                            |
| Northeast                              | 1662 (20.7)                | 1165 (19.1)                | 992 (19.3)                 | 796 (22.4)                 |
| North Central                          | 2706 (33.7)                | 2127 (34.9)                | 1785 (34.8)                | 1047 (29.4)                |
| South                                  | 3005 (37.4)                | 2327 (38.2)                | 1959 (38.2)                | 1342 (37.7)                |
| West                                   | 660 (8.2)                  | 460 (7.6)                  | 394 (7.7)                  | 368 (10.3)                 |
| Unknown                                | 6 (0.1)                    | 8 (0.1)                    | 4 (0.1)                    | 4 (0.1)                    |

167

168

169

170

(\*) For uncomplicated urinary tract infection, we included female patients only because all urinary tract infections in men are considered complicated. The sample size decreased overtime in MarketScan due to changes in health plans participating in the database. The database includes more South region in recent years.

171 **eTable 5. Impact of Label Changes on Antibiotic Use by Medical Condition– Interrupted Time-series Analyses**

|                                                                   | Risk difference (95% CI) |                                        |                                   |                                   |
|-------------------------------------------------------------------|--------------------------|----------------------------------------|-----------------------------------|-----------------------------------|
|                                                                   | Prevalence in Jan'2015   | Average monthly change before May 2016 | Immediate change after May 2016   | Change in trend after May 2016    |
| <b>Uncomplicated UTI</b>                                          |                          |                                        |                                   |                                   |
| Nitrofurantoin (1 <sup>st</sup> line)                             | 26.6 (26.0;27.2)         | 0.17 (0.15;0.19)                       | 2.99 (2.40;3.58)                  | 0.29 (0.24;0.34)                  |
| Trimethoprim-sulfamethoxazole (1 <sup>st</sup> line)              | 22.4 (21.7;23.2)         | -0.06 (-0.09;-0.03)                    | 3.48 (2.92;4.04)                  | -0.03 (-0.07;0.01) <sup>(a)</sup> |
| Quinolones (2 <sup>nd</sup> line)                                 | 41.6 (40.6;42.5)         | -0.06 (-0.11;-0.01)                    | -7.21 (-8.62;-5.80)               | -0.41 (-0.51;-0.31)               |
| β-lactams (2 <sup>nd</sup> line, exclude amoxicillin, ampicillin) | 6.3 (6.0;6.6)            | 0(-0.02;0.02) <sup>(a)</sup>           | 0.61 (0.37;0.86)                  | 0.12 (0.1;0.14)                   |
| <b>Acute sinusitis</b>                                            |                          |                                        |                                   |                                   |
| Amoxicillin-Clavulanate (1 <sup>st</sup> line)                    | 30.2 (29.8;30.6)         | 0.17 (0.13;0.21)                       | -0.41 (-0.89;0.07) <sup>(a)</sup> | 0.04 (0;0.08) <sup>(a)</sup>      |
| Amoxicillin (1 <sup>st</sup> line)                                | 13.1 (12.9;13.4)         | 0.03 (0.02;0.04)                       | 0.66 (0.52;0.8)                   | -0.03 (-0.05;-0.01)               |
| Cephalosporins (2 <sup>nd</sup> line)                             | 12.1 (11.8;12.4)         | -0.04 (-0.06;-0.02)                    | 0.44 (0.19;0.69)                  | 0 (-0.02;0.02) <sup>(a)</sup>     |
| Tetracyclines (2 <sup>nd</sup> line)                              | 4.1 (3.8;4.3)            | 0.08 (0.07;0.09)                       | 0.22 (0.05;0.39)                  | 0.04 (0.03;0.05)                  |
| Quinolones (2 <sup>nd</sup> line)                                 | 8.3 (7.9;8.6)            | -0.09 (-0.12;-0.06)                    | -1.23 (-1.52;-0.94)               | 0 (-0.04;0.04) <sup>(a)</sup>     |
| Macrolides (not recommended)                                      | 31.7 (31.2;32.2)         | -0.15 (-0.19;-0.11)                    | 0.28 (-0.03;0.59) <sup>(a)</sup>  | -0.04 (-0.08;0) <sup>(a)</sup>    |
| <b>Acute exacerbation COPD</b>                                    |                          |                                        |                                   |                                   |
| Macrolides (1 <sup>st</sup> line)                                 | 36.4 (3.16;38.6)         | 0.17 (0.09;0.25)                       | 0.80 (-0.27;1.87) <sup>(a)</sup>  | -0.15 (-0.24;-0.06)               |
| Cephalosporines (1 <sup>st</sup> line)                            | 8.2 (6.5;9.9)            | 0.06 (-0.04;0.16) <sup>(a)</sup>       | -0.24 (-1.22;0.74) <sup>(a)</sup> | -0.01 (-0.11;0.09) <sup>(a)</sup> |
| Quinolones (2 <sup>nd</sup> line)                                 | 31.9 (30.3;33.4)         | -0.21 (-0.31;-0.11)                    | -2.58 (-4.05;-1.11)               | -0.09 (-0.21;0.03) <sup>(a)</sup> |
| Amoxicillin-Clavulanate (2 <sup>nd</sup> line)                    | 6.7 (5.4;8.0)            | -0.01 (-0.07;0.05) <sup>(a)</sup>      | 1.05 (0.31;1.79)                  | 0.02 (-0.04;0.08) <sup>(a)</sup>  |
| Tetracyclines (not recommended)                                   | 11.2 (8.6;13.4)          | 0.03 (-0.07;0.13) <sup>(a)</sup>       | 1.14 (-0.08;2.36) <sup>(a)</sup>  | 0.20 (0.07;0.33)                  |

172  
173 <sup>(a)</sup> p>0.05; Notes: Antibiotic classes with <5% of total antibiotics use are omitted, UTI: urinary tract infection, COPD: chronic obstructive pulmonary disease.

174



175 **eTable 6. Sensitivity analyses for interrupted time series models when excluding the phase-in period surrounding**  
 176 **the labeling change (Nov 2015 to Jul 2016), lag effect (May to Jul 2016), falsification test in non-quinolone**  
 177 **antibiotic use for skin infection and testing for spillovers effects in quinolone use for community acquired**  
 178 **pneumonia.**

|                                             |                                 | Prevalence at the beginning of the study period | Average monthly change before label change | Immediate change after label change | Change in trend after label change |
|---------------------------------------------|---------------------------------|-------------------------------------------------|--------------------------------------------|-------------------------------------|------------------------------------|
| Main design                                 | Uncomplicated UTI               | 41.6 (40.6;42.5)                                | -0.06 (-0.11;-0.01)                        | -7.21 (-8.62;-5.80)                 | -0.41 (-0.51;-0.31)                |
|                                             | Acute sinusitis                 | 8.3 (7.9;8.6)                                   | -0.09 (-0.12;-0.06)                        | -1.23 (-1.52;-0.94)                 | 0 (-0.04;0.04)                     |
|                                             | Acute exacerbation COPD         | 31.9 (30.3;33.4)                                | -0.21 (-0.31;-0.11)                        | -2.58 (-4.05;-1.11)                 | -0.09 (-0.21;0.03)                 |
| Excluding phase-in period (Nov 15 – Jul 16) | Uncomplicated UTI               | 41.6 (40.8;42.3)                                | 0.03 (-0.08;0.14)                          | -10.79 (-11.45;-10.13)              | -0.43 (-0.55;-0.31)                |
|                                             | Acute sinusitis                 | 8.4 (8.0;8.8)                                   | -0.10 (-0.15;-0.05)                        | -2.19 (-2.4;-1.98)                  | 0.02 (-0.02;0.06)                  |
|                                             | Acute exacerbation COPD         | 33.6 (31.0;36.3)                                | -0.25 (-0.56;0.06)                         | -5.58 (-7.7;-3.46)                  | 0 (-0.31;0.31)                     |
| Excluding phase-in period (May 16 – Jul 18) | Uncomplicated UTI               | 41.8 (41.5;42.3)                                | -0.09 (-0.12;-0.06)                        | -9.7 (-10.2;-9.2)                   | -0.32 (-0.36;-0.28)                |
|                                             | Acute sinusitis                 | 8.3 (8.0;8.7)                                   | -0.09 (-0.12;-0.06)                        | -1.67 (-1.91;-1.43)                 | 0.01 (-0.02;0.04)                  |
|                                             | Acute exacerbation COPD         | 32.1 (30.3;33.8)                                | -0.23 (-0.33;-0.13)                        | -4.32 (-5.67;-2.97)                 | -0.02 (-0.15;0.11)                 |
| Negative control indication *               | Skin and subcutaneous infection | 57.1 (56.1;58.0)                                | 0.15 (0.13;0.17)                           | 0.63 (-0.14;1.4)                    | -0.1 (-0.2;0)                      |
| Spill-over effects                          | Community-acquired pneumonia    | 41.0 (40.5;41.4)                                | -0.11 (-0.14;-0.08)                        | -4.05 (-4.5;-3.6)                   | -0.27 (-0.3;-0.24)                 |

179 \* Quinolones encompassed less than 5% of antibiotics used for these indications in both the pre- and post-label change periods. UTI: urinary tract infection, COPD: chronic obstructive  
 180 pulmonary disease.

181

182 **eTable 7. Joinpoint regression results**

|                         | <b>Best models</b> |                                   |                                      |
|-------------------------|--------------------|-----------------------------------|--------------------------------------|
|                         | <b>Joinpoint</b>   | <b>Point estimate<br/>(95%CI)</b> | <b>Equivalent months<br/>(95%CI)</b> |
| Uncomplicated UTI       | 1                  | 40 (39-41)                        | Apr 2016<br>(Mar 2016 – May 2016)    |
|                         | 2                  | 44 (43-45)                        | Aug 2016<br>(Jul 2016 – Sep 2016)    |
| Acute sinusitis         | 1                  | 21 (10-29)                        | Sep 2014<br>(Oct 2013 – May 2015)    |
|                         | 2                  | 39 (35-43)                        | Mar 2016<br>(Nov 2015 – Jul 2016)    |
|                         | 3                  | 45 (43-51)                        | Sep 2016<br>(Jul 2016 – Mar 2017)    |
| Acute exacerbation COPD | 1                  | 35 (21-41)                        | Nov 2015<br>(Sep 2014 – May 2016)    |
|                         | 2                  | 50 (32-64)                        | Feb 2017<br>(Aug 2015 – Apr 2018)    |

183

184

185 **eTable 8: Monthly aggregated input data for the interrupted time series analysis of the three study cohorts**

| Time   | Uncomplicated UTI |           |       | Acute sinusitis |           |      | Acute exacerbation COPD |           |       |
|--------|-------------------|-----------|-------|-----------------|-----------|------|-------------------------|-----------|-------|
|        | Total abx         | Quinolone | %     | Total abx       | Quinolone | %    | Total abx               | Quinolone | %     |
| Jan-15 | 20411             | 8456      | 41.43 | 69229           | 6093      | 8.80 | 874                     | 297       | 33.98 |
| Feb-15 | 17960             | 7398      | 41.19 | 63123           | 5247      | 8.31 | 796                     | 250       | 31.41 |
| Mar-15 | 20153             | 8329      | 41.33 | 63518           | 4746      | 7.47 | 868                     | 250       | 28.80 |
| Apr-15 | 20243             | 8272      | 40.86 | 52607           | 4001      | 7.61 | 877                     | 283       | 32.27 |
| May-15 | 20231             | 8390      | 41.47 | 41841           | 3307      | 7.90 | 743                     | 242       | 32.57 |
| Jun-15 | 22568             | 9152      | 40.55 | 32784           | 2507      | 7.65 | 642                     | 201       | 31.31 |
| Jul-15 | 24516             | 9974      | 40.68 | 26459           | 2168      | 8.19 | 577                     | 181       | 31.37 |
| Aug-15 | 23829             | 9789      | 41.08 | 29258           | 2262      | 7.73 | 472                     | 149       | 31.57 |
| Sep-15 | 21421             | 8836      | 41.25 | 38337           | 2902      | 7.57 | 606                     | 168       | 27.72 |
| Oct-15 | 16935             | 7193      | 42.47 | 40509           | 2950      | 7.28 | 565                     | 176       | 31.15 |
| Nov-15 | 14660             | 5987      | 40.84 | 40568           | 2903      | 7.16 | 487                     | 143       | 29.36 |
| Dec-15 | 12850             | 5275      | 41.05 | 45953           | 3296      | 7.17 | 532                     | 156       | 29.32 |
| Jan-16 | 13705             | 5493      | 40.08 | 53334           | 3760      | 7.05 | 549                     | 171       | 31.15 |
| Feb-16 | 13494             | 5391      | 39.95 | 57853           | 3993      | 6.90 | 643                     | 181       | 28.15 |
| Mar-16 | 14526             | 5855      | 40.31 | 52485           | 3788      | 7.22 | 701                     | 195       | 27.82 |
| Apr-16 | 13244             | 5301      | 40.03 | 38761           | 2606      | 6.72 | 606                     | 179       | 29.54 |
| May-16 | 13678             | 5176      | 37.84 | 34545           | 2166      | 6.27 | 570                     | 157       | 27.54 |
| Jun-16 | 14699             | 5126      | 34.87 | 26839           | 1642      | 6.12 | 491                     | 134       | 27.29 |
| Jul-16 | 14817             | 4916      | 33.18 | 20695           | 1154      | 5.58 | 369                     | 115       | 31.17 |
| Aug-16 | 15893             | 4812      | 30.28 | 25632           | 1382      | 5.39 | 377                     | 96        | 25.46 |
| Sep-16 | 13921             | 4254      | 30.56 | 31854           | 1661      | 5.21 | 414                     | 89        | 21.50 |
| Oct-16 | 12640             | 3749      | 29.66 | 32699           | 1648      | 5.04 | 422                     | 98        | 23.22 |
| Nov-16 | 11570             | 3403      | 29.41 | 40694           | 2008      | 4.93 | 456                     | 110       | 24.12 |
| Dec-16 | 9285              | 2686      | 28.93 | 48010           | 2241      | 4.67 | 489                     | 119       | 24.34 |
| Jan-17 | 10797             | 2934      | 27.17 | 55804           | 2712      | 4.86 | 556                     | 127       | 22.84 |
| Feb-17 | 10295             | 2948      | 28.64 | 52542           | 2435      | 4.63 | 531                     | 120       | 22.60 |
| Mar-17 | 11469             | 3216      | 28.04 | 47080           | 2135      | 4.53 | 526                     | 110       | 20.91 |
| Apr-17 | 10547             | 2773      | 26.29 | 32337           | 1302      | 4.03 | 467                     | 103       | 22.06 |
| May-17 | 11910             | 3058      | 25.68 | 33310           | 1393      | 4.18 | 471                     | 99        | 21.02 |
| Jun-17 | 12678             | 3289      | 25.94 | 24922           | 1061      | 4.26 | 450                     | 85        | 18.89 |
| Jul-17 | 13152             | 3250      | 24.71 | 18547           | 760       | 4.10 | 319                     | 76        | 23.82 |
| Aug-17 | 13703             | 3449      | 25.17 | 23283           | 979       | 4.20 | 349                     | 67        | 19.20 |
| Sep-17 | 11622             | 2868      | 24.68 | 29542           | 1209      | 4.09 | 372                     | 75        | 20.16 |
| Oct-17 | 11474             | 2805      | 24.45 | 29857           | 1112      | 3.72 | 380                     | 93        | 24.47 |

| Time   | Uncomplicated UTI |           |       | Acute sinusitis |           |      | Acute exacerbation COPD |           |       |
|--------|-------------------|-----------|-------|-----------------|-----------|------|-------------------------|-----------|-------|
|        | Total abx         | Quinolone | %     | Total abx       | Quinolone | %    | Total abx               | Quinolone | %     |
| Nov-17 | 10223             | 2482      | 24.28 | 38960           | 1506      | 3.87 | 430                     | 95        | 22.09 |
| Dec-17 | 7859              | 1893      | 24.09 | 39790           | 1406      | 3.53 | 283                     | 53        | 18.73 |
| Jan-18 | 10152             | 2304      | 22.70 | 47917           | 1807      | 3.77 | 478                     | 96        | 20.08 |
| Feb-18 | 9460              | 2153      | 22.76 | 35097           | 1316      | 3.75 | 370                     | 80        | 21.62 |
| Mar-18 | 10318             | 2304      | 22.33 | 34674           | 1209      | 3.49 | 370                     | 76        | 20.54 |
| Apr-18 | 10169             | 2251      | 22.14 | 29070           | 1028      | 3.54 | 357                     | 66        | 18.49 |
| May-18 | 11251             | 2550      | 22.66 | 26488           | 928       | 3.50 | 358                     | 72        | 20.11 |
| Jun-18 | 11575             | 2578      | 22.27 | 21142           | 712       | 3.37 | 305                     | 65        | 21.31 |
| Jul-18 | 12346             | 2525      | 20.45 | 16754           | 563       | 3.36 | 227                     | 44        | 19.38 |
| Aug-18 | 12682             | 2600      | 20.50 | 19114           | 638       | 3.34 | 245                     | 37        | 15.10 |
| Sep-18 | 11031             | 2131      | 19.32 | 22457           | 675       | 3.01 | 241                     | 46        | 19.09 |
| Oct-18 | 10800             | 2160      | 20.00 | 24930           | 795       | 3.19 | 297                     | 53        | 17.85 |
| Nov-18 | 9466              | 1818      | 19.21 | 30988           | 896       | 2.89 | 309                     | 45        | 14.56 |

186 Abx: Antibiotics

187

188
